# Supplementary material for: An overview of the Western United States Dynamically Downscaled Dataset (WUS-D3)
Source: Copernicus journal article supplement (doi:10.5194/gmd-17-2265-2024), 2024-03-20
Supplement: Supplementary file 1 [file gmd-17-2265-2024-supplement.pdf]

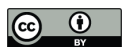

*Supplement of*

## **An overview of the Western United States Dynamically Downscaled Dataset (WUS-D3)**

**Stefan Rahimi et al.**

*Correspondence to:* Stefan Rahimi (srahimi@uwyo.edu)

The copyright of individual parts of the supplement might differ from the article licence.

## 1980-2009 SSTs

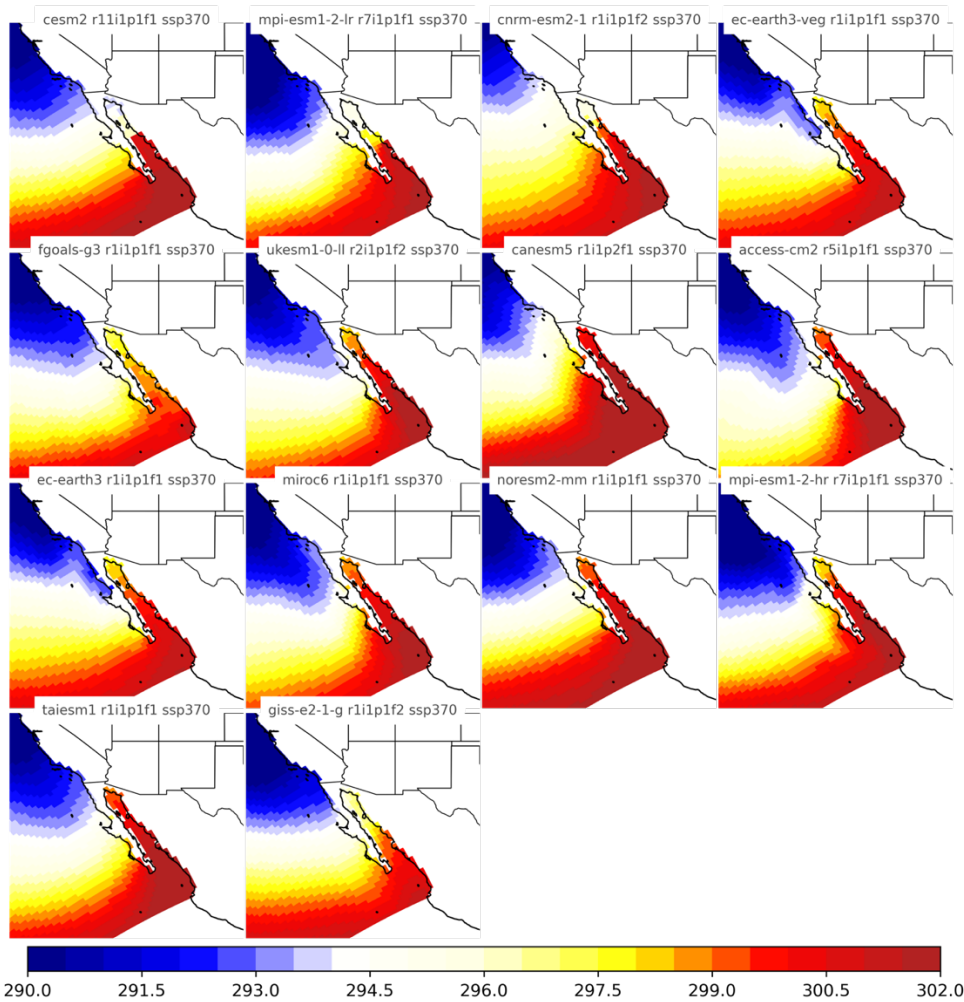

**Figure S1. Annual-mean sea surface temperatures (SSTs; [K]) from 1980-2009 from 14 GCMs considered in this study**

## DJF surface air temperature bias

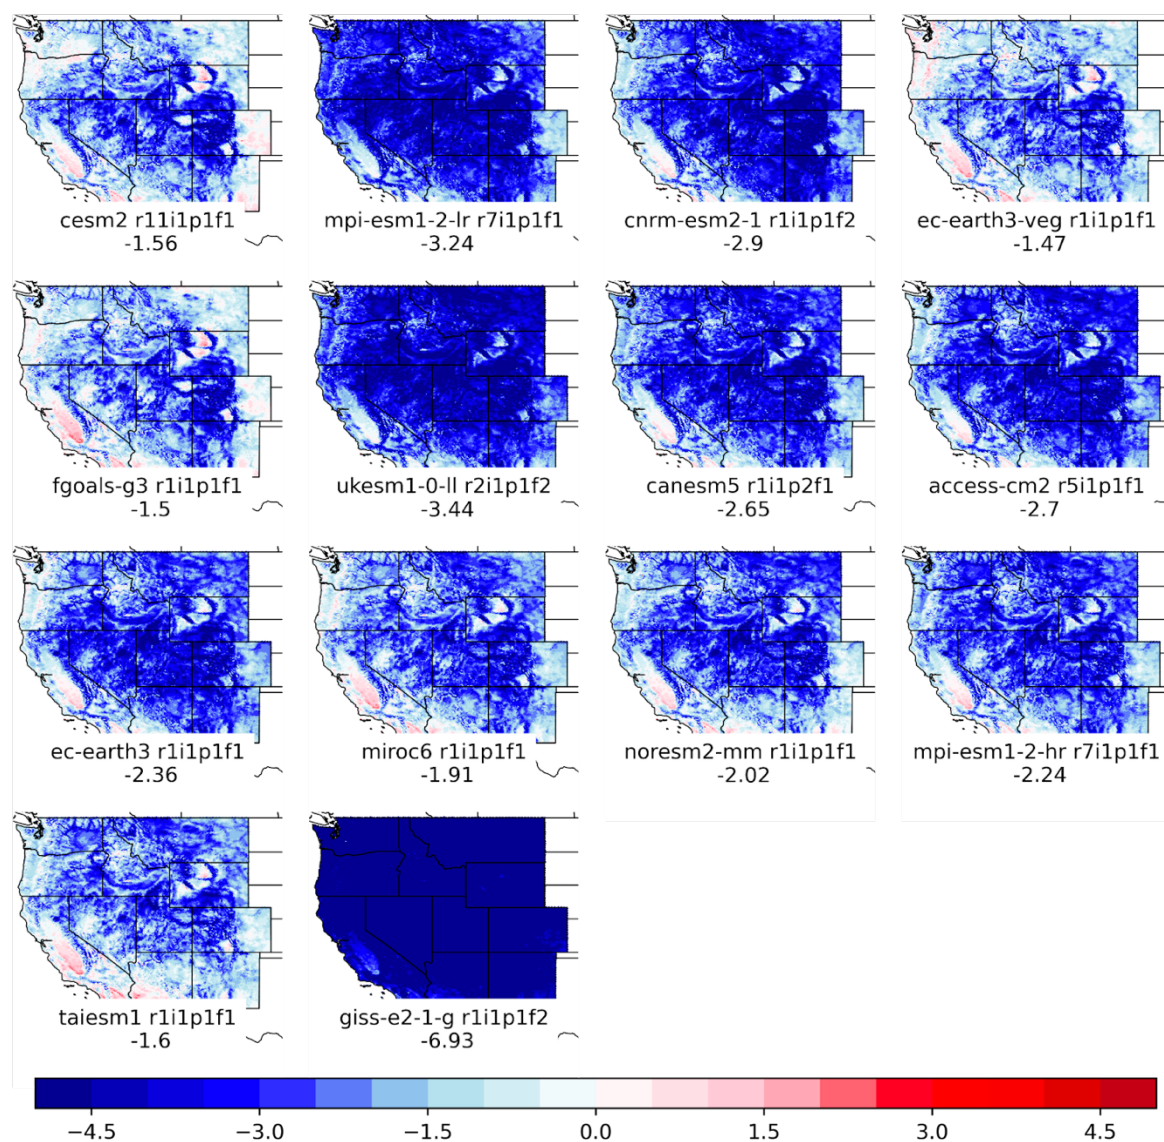

**Figure S2. Wintertime (DJF) biases [K] in dynamically downscaled surface air temperature from 1981-2010 relative to PRISM. 11-state-mean biases are presented beneath each GCM label.**

## DJF precipitation bias

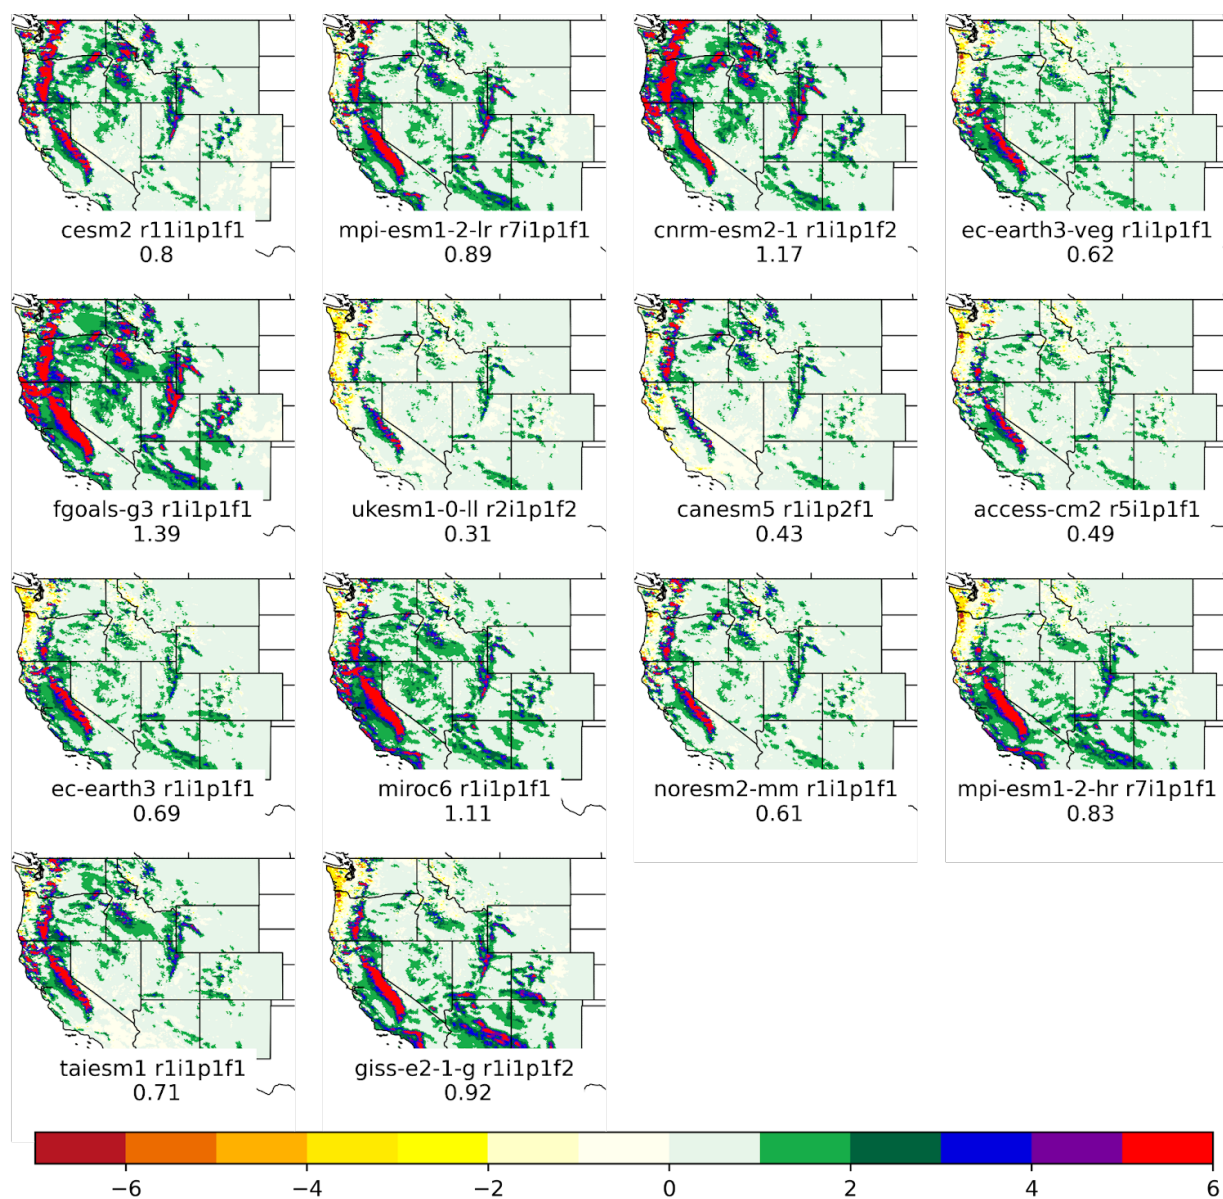

Figure S3. Same as in Fig. S2, but for precipitation rate [ $\text{mm d}^{-1}$ ].

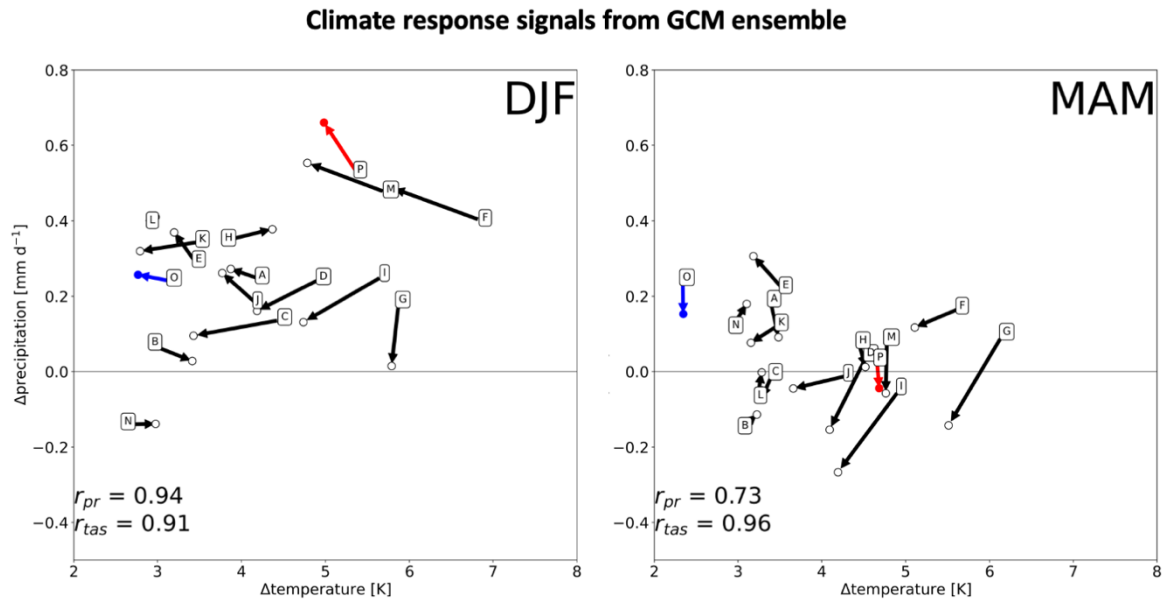

**Figure S4.** Future winter (DJF) and springtime (MAM) climate response for parent GCMs (indicated by lettering) and their downscaled counterparts (indicated by circles) on the 9-km WRF grid averaged across 11 western U.S. states (End-Century). Non-colored circles are for SSP3-7.0 projections only, while blue (red) circles represent the SSP2-4.5 (SSP5-8.5) projections. Arrows point away from parent GCMs towards downscaled counterparts.

## Temperature change by EC

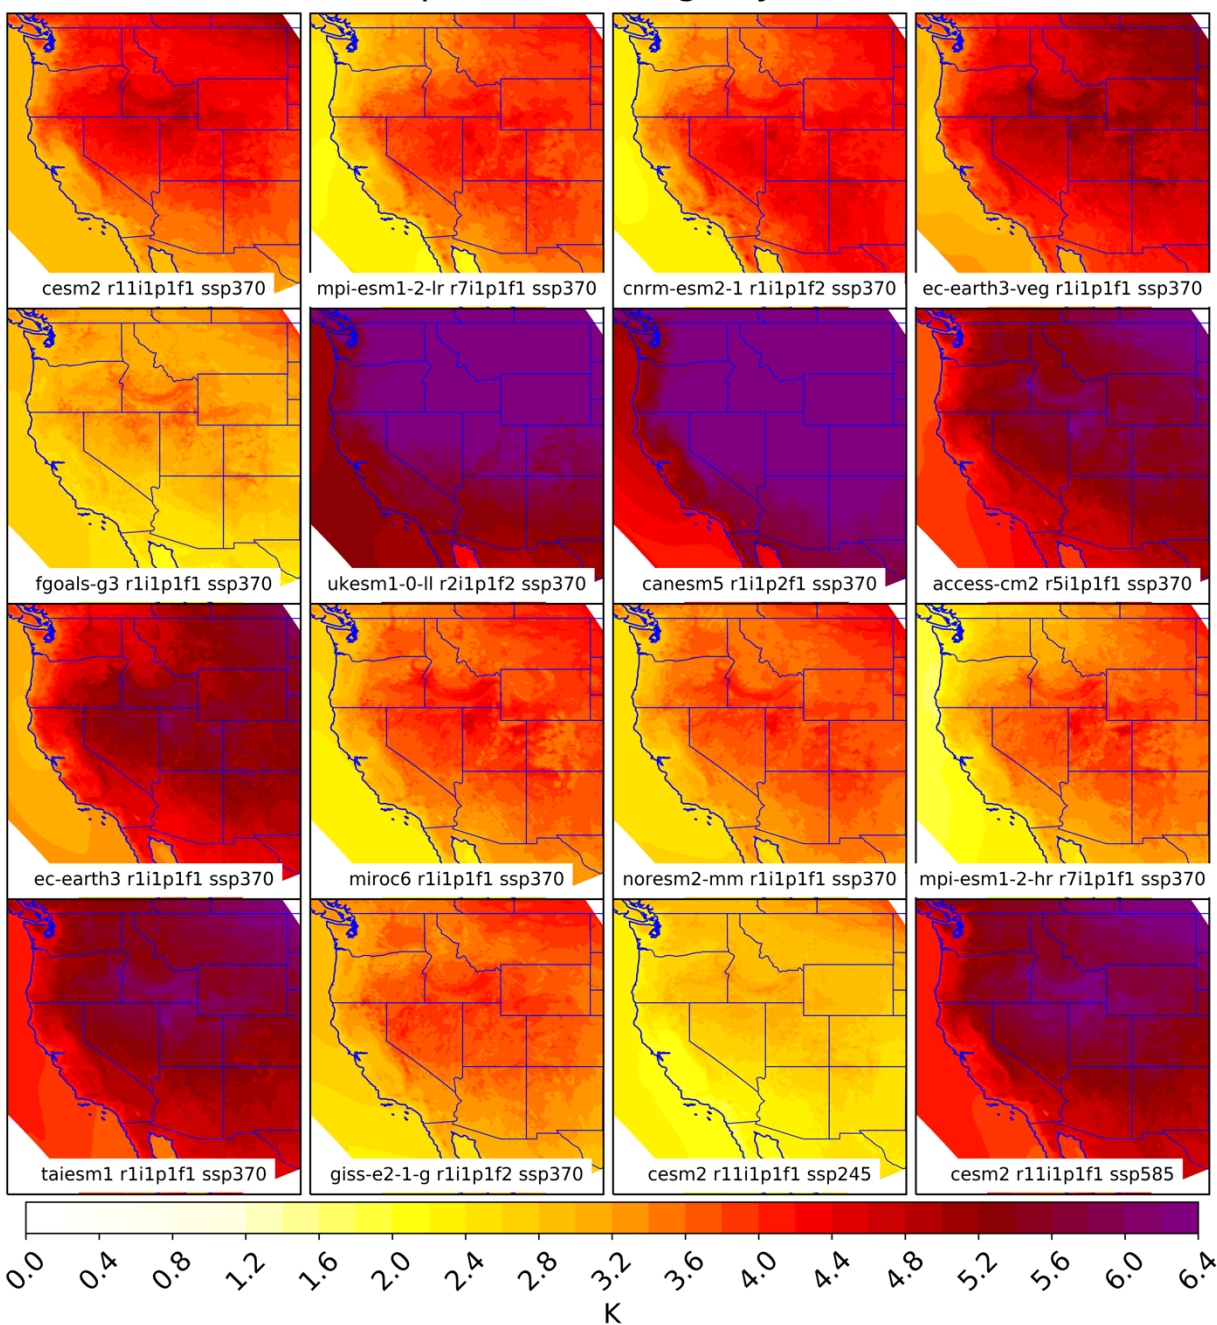

**Figure S5.** Changes in annual-mean surface air temperature [K] by the end-of-century (2070-2100) period.

## Precipitation change by EC

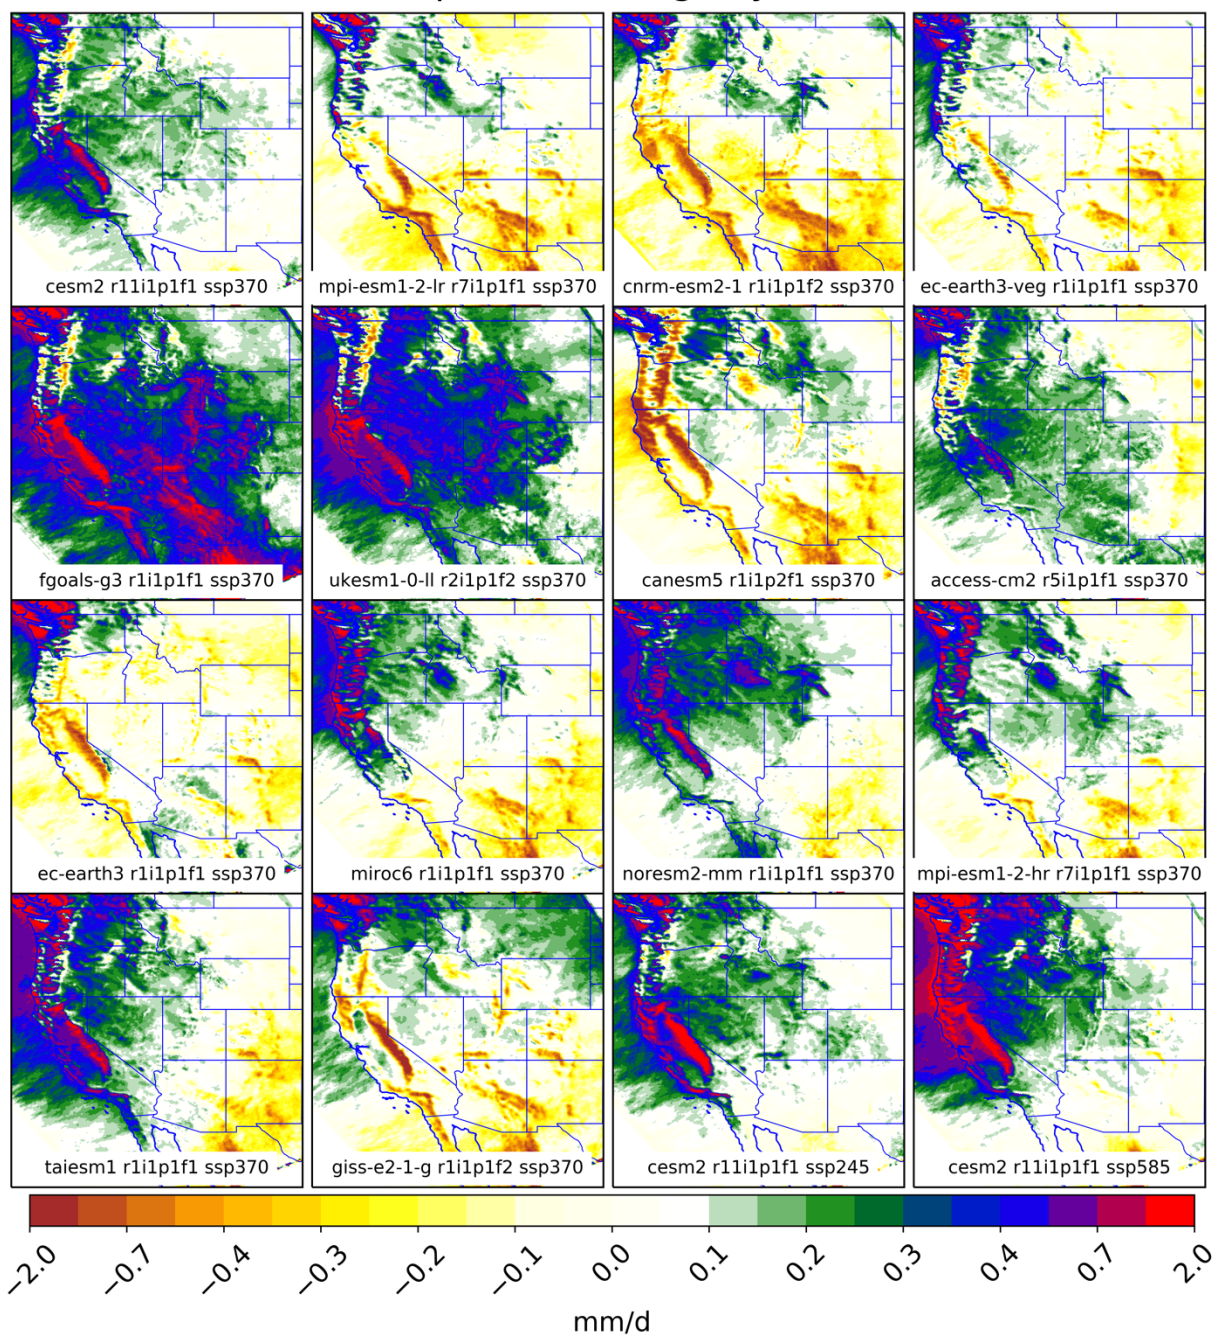

**Figure S6.** Same as in Fig. S5, but for precipitation [ $\text{mm d}^{-1}$ ].

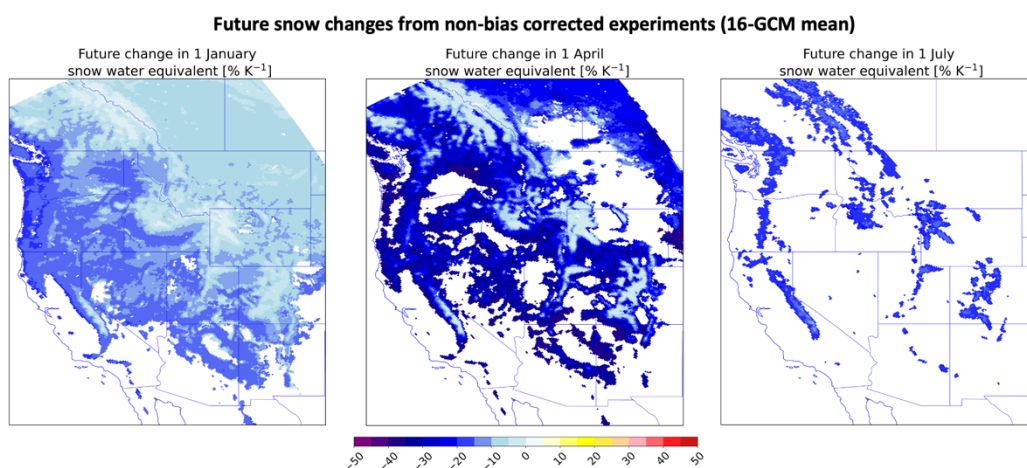

**Figure S7.** Future changes in 1 January (left), 1 April (middle), and 1 July (right) snow water equivalent normalized by the amount of global warming [% K<sup>-1</sup>] in the 16-GCM mean.

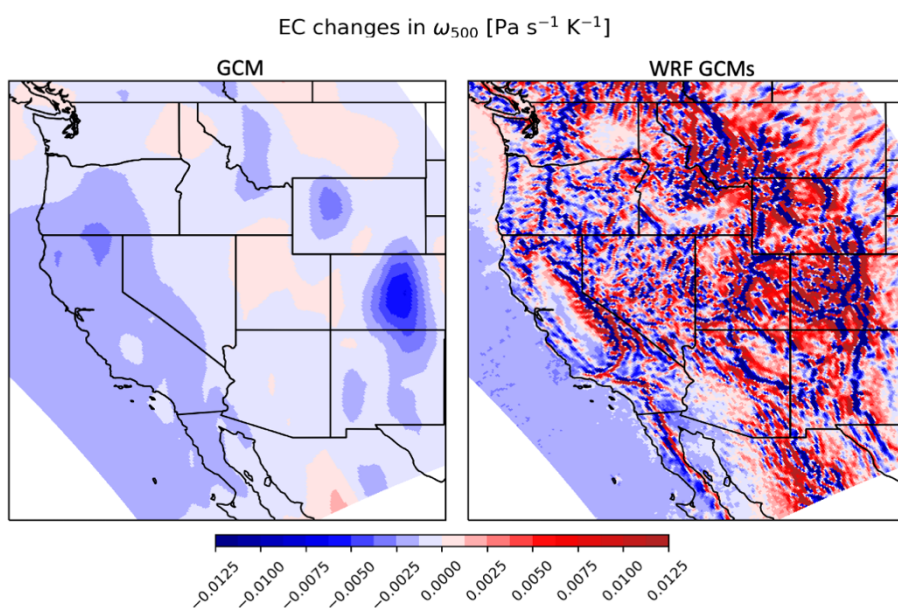

**Figure S8.** Ensemble-mean future changes in 500 hPa pressure velocity normalized by end-of-century (2070-2100) mean global warming [Pa s<sup>-1</sup> K<sup>-1</sup>].

## Fractional precipitation change from GCMs

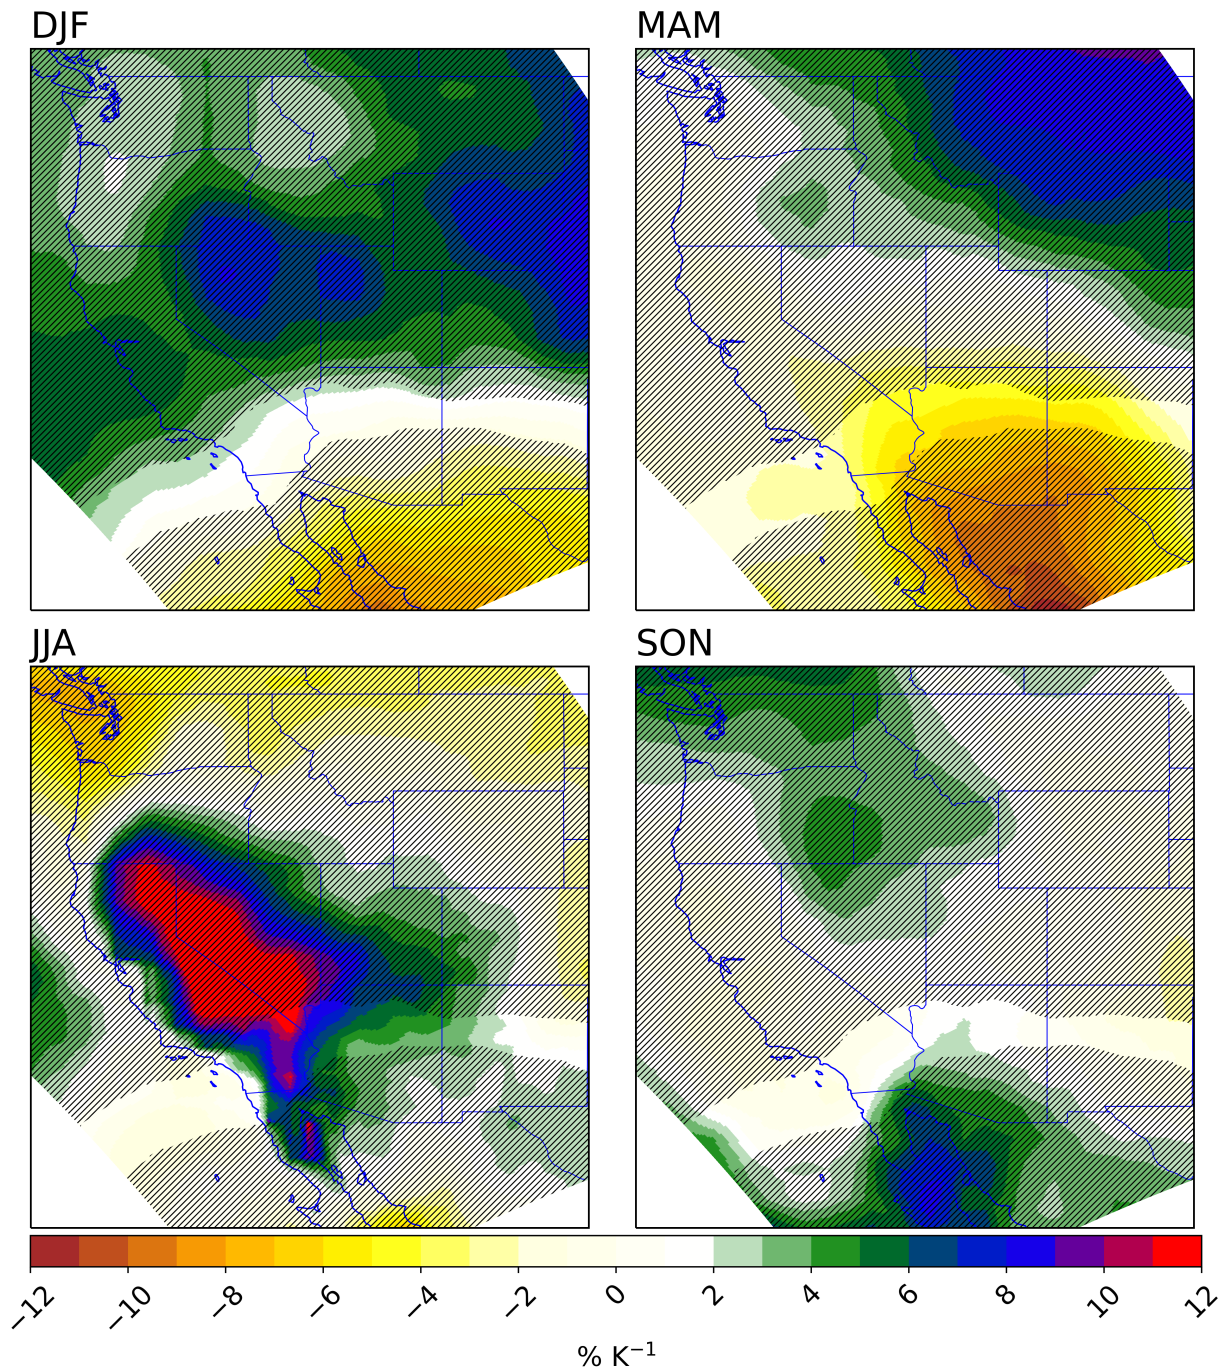

**Figure S9.** 16-GCM-mean future changes in native-GCM fractional precipitation normalized by the amount of global warming [ $\% K^{-1}$ ]. Hatching indicates statistical significance to the 95% confidence interval when grid point distributions are subjected to a two-sided Student's t-test. Stippling is not included for temperature because every grid point returns a p value smaller than 0.05.

# rx1 change by EC

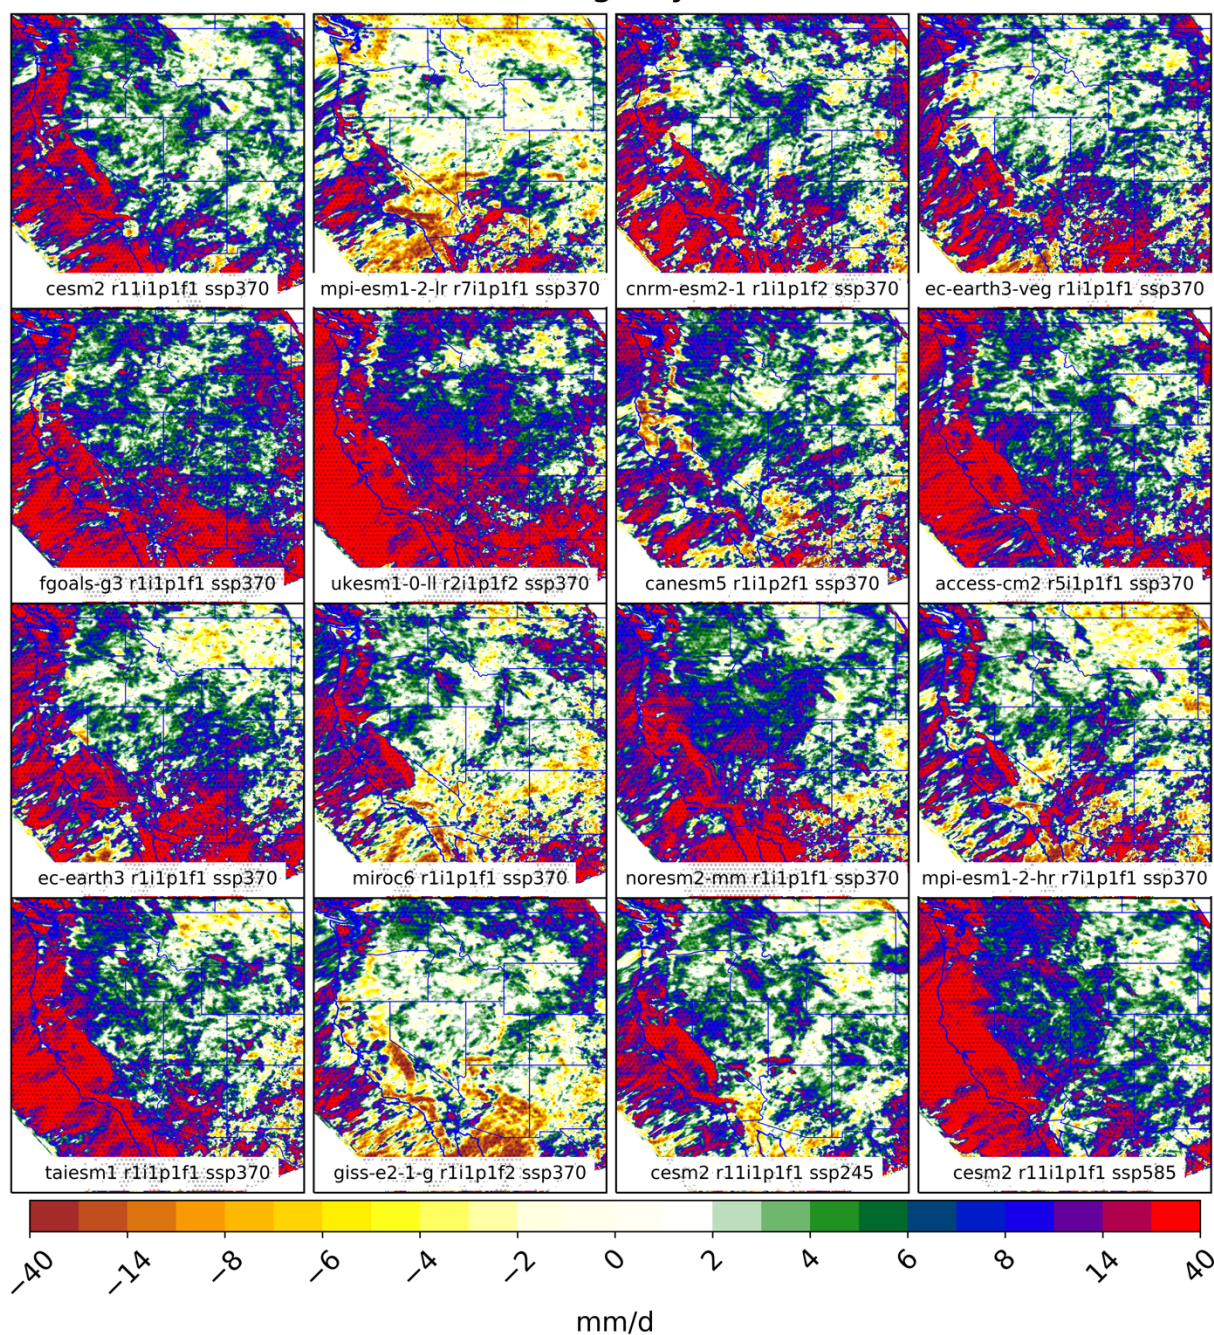

**Figure 10.** End-of-century (2070-2100) changes in rx1day precipitation [ $\text{mm d}^{-1}$ ] for each GCM. Circles denote statistical significance to the 95% for a two-sided Student's t-test.

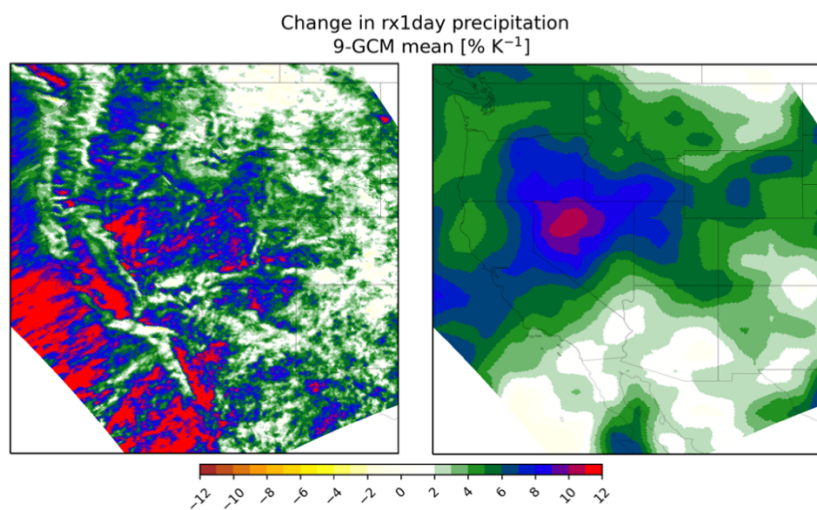

**Figure S11.** Future change in (left) WRF and (right) GCM rx1day precipitation [% K<sup>-1</sup>] considering a 9-GCM mean.

# Future changes in Tmax99 [#days/year/K]

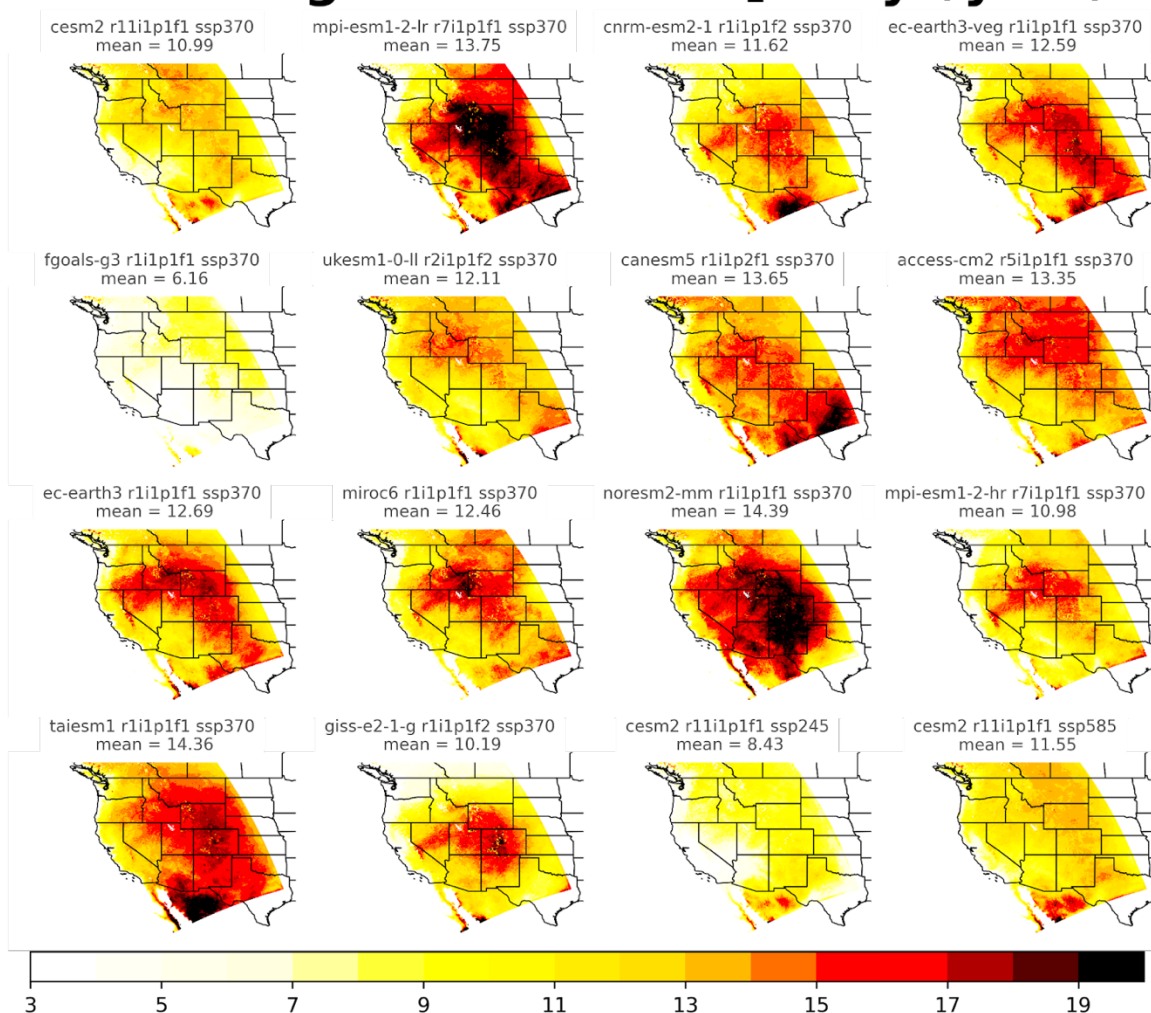

**Figure S12.** Future changes in maximum daily 99<sup>th</sup> percentile surface air temperature (Tmax99) per degree of global warming [days year<sup>-1</sup> K<sup>-1</sup>] for each downscaled GCM.

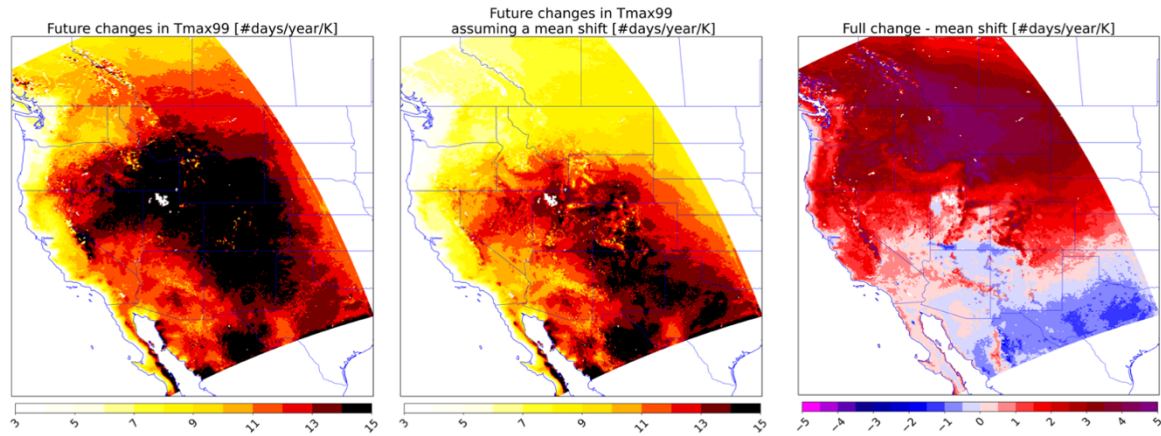

**Figure S13.** 11-GCM future changes in maximum daily 99<sup>th</sup> percentile surface air temperature (Tmax99) per degree of global warming [ $\text{days year}^{-1} \text{K}^{-1}$ ] considering the full change (left) and assuming a mean shift in the temperature distribution (middle). The right panel presents the difference between the left and center panels.
